# Supplementary material
Source: HighWire-hosted journal article supplement (https://bmjopen.bmj.com/content/13/12/e075671)
Supplement: inline-supplementary-material-2 [file inline-supplementary-material-2.pdf]

**Introduction:** Thank you for participating in this study. My name is [short introduction interviewer]. The research that we are doing is focused on persons who are living at home. I would like to talk with you about your living situation at home, the daily things that you do and the help that you receive. If I ask a question that is not clear, feel free to let me know. There are no wrong answers, you can say anything that comes to mind. I would like to record the interview, if that is ok with you. The recordings will only be shared with my colleagues. The conversation will not be shared with your doctor or family. We will leave out your name. your name will be replaced by a number. *[reading information letter + informed consent – signing informed consent – start recording]*

Before we start, I have a few general questions that I would like to ask you: 1) What education did you receive? 2) Where were you born? 3) Where were your parents born? 4) How long have you lived in the Netherlands? 5) How old are you? 6) Where do you live? 7) Do you live alone? 8) Where does your family live?

| Theme                   | Explanation theme                                                                                                                                                                                                                                                 | Examples of questions                                                                                                                                           |
|-------------------------|-------------------------------------------------------------------------------------------------------------------------------------------------------------------------------------------------------------------------------------------------------------------|-----------------------------------------------------------------------------------------------------------------------------------------------------------------|
| Introduction            | Start-up questions giving respondent room to talk and bring up topics.                                                                                                                                                                                            | <ul style="list-style-type: none"> <li>Can you tell something about yourself?</li> <li>How is it going at home?</li> <li>How is your health?</li> </ul>         |
| Daily activities        | <p>Talk about: (help with) cleaning, cooking, showering, getting dressed etc.</p> <p>Have attention for religious activities praying, going to mosque/church.</p> <p>Find out if they get help with these activities, from who, and how they value this help.</p> | <ul style="list-style-type: none"> <li>What are daily activities that you do?</li> <li>What does your day look like?</li> </ul>                                 |
| Social activities       | <p>Talk about: social activities such as, female/male groups, visiting other persons etc.</p> <p>Ask if people go to a daycare facility.</p> <p>For informal caregivers: ask if they have time to do things for themselves.</p>                                   | <ul style="list-style-type: none"> <li>What are things that you like to do?</li> <li>What are things that you like to do with other people?</li> </ul>          |
| Adaptations in the home | Talk about: adaptations such as a stair lift, grips in the shower, alarm system etc.                                                                                                                                                                              | <ul style="list-style-type: none"> <li>What changes are made in your house?</li> <li>What are things that you would like to change about your house?</li> </ul> |
|                         |                                                                                                                                                                                                                                                                   |                                                                                                                                                                 |

|                                  |                                                                                                                                                                         |                                                                                                                                                                                                      |
|----------------------------------|-------------------------------------------------------------------------------------------------------------------------------------------------------------------------|------------------------------------------------------------------------------------------------------------------------------------------------------------------------------------------------------|
| Information                      | Talk about: information received after diagnosis about what to expect or how to cope with dementia.                                                                     | <ul style="list-style-type: none"> <li>• Have you gotten information about what to expect (after diagnosis)?</li> <li>• What questions do you have about dementia?</li> </ul>                        |
| Contact with care professionals  | Talk about: how people experience contact with care professionals such as home care, general practitioner, and the case manager dementia.                               | <ul style="list-style-type: none"> <li>• What do you think of the home care providers?</li> <li>• How is your contact with the general practitioner?</li> </ul>                                      |
| Navigating the healthcare system | Talk about: does the person arrange care themselves or do they get help (from family, general practitioner, or case manager).<br><br>Do they struggle with this or not. | <ul style="list-style-type: none"> <li>• How is the care arranged?</li> <li>• Who arranges this support/care?</li> <li>• How would you like to be supported with the arrangement of care?</li> </ul> |
| Emotional support                | Talk about: how people feel about their situation, their worries or concerns.<br><br>Do they talk about this and with who.                                              | <ul style="list-style-type: none"> <li>• How do you feel about your situation (dementia diagnosis)?</li> <li>• do you have someone to discuss your concerns with?</li> </ul>                         |
| Closing questions                | Question to end the interview, ask if participants want to add something.                                                                                               | <ul style="list-style-type: none"> <li>• What are things that you would like to get help with?</li> <li>• Are there things that you would like to add?</li> </ul>                                    |

#### Examples of probing questions

- With who do you do this? / Who helps you with this?
- How often do you do this? / How often do you get this help?
- What do you like about this help/support?
- What do you dislike about this (help/support)?

Thank you so much for sharing your story. *[ask if people want to be informed about the results of the study].*
